# Supplementary material
Source: HighWire-hosted journal article supplement (https://www.cmaj.ca/highwire/filestream/81430/field_highwire_adjunct_files/3/211416-res-4-at.pdf)
Supplement: 211416-res-4-at.pdf [file 211416-res-4-at.pdf]

## Appendix 4: Quality Appraisal

### 4.1 Cross-sectional Studies

| Cross Sectional Tool | Sampling |    |     |     |     |     | Measurement |    |    | Statistical Analysis |     |     |     | Total Points | Maximum Points | Score | Quality       |
|----------------------|----------|----|-----|-----|-----|-----|-------------|----|----|----------------------|-----|-----|-----|--------------|----------------|-------|---------------|
|                      | Q1       | Q2 | Q3  | Q4  | Q5  | Q6  | Q7          | Q8 | Q9 | Q10                  | Q11 | Q12 | Q13 |              |                |       |               |
| Aarts, 2012          | 0        | 1  | 1   | 1   | 1   | N/A | 1           | 0  | 1  | 1                    | 1   | 1   | 1   | 10           | 14             | 0.71  | High-moderate |
| Ahmed, 2014          | 0        | 2  | 1   | N/A | 1   | N/A | 1           | 0  | 0  | 1                    | 0   | 1   | 0   | 7            | 12             | 0.58  | Low-moderate  |
| Alghamdi, 2016       | 0        | 2  | 1   | N/A | 1   | N/A | 1           | 0  | 1  | 1                    | 1   | 1   | 1   | 10           | 12             | 0.83  | Strong        |
| Allin, 2013          | 1        | 1  | N/A | N/A | 1   | N/A | 1           | 1  | 0  | 1                    | N/A | N/A | 0   | 6            | 9              | 0.67  | High-moderate |
| Armstrong, 2011      | 0        | 0  | 1   | N/A | 1   | N/A | 0           | 0  | 1  | 1                    | 1   | 1   | 0   | 6            | 12             | 0.50  | Weak          |
| Banihashemi, 2009    | 0        | 2  | 1   | N/A | 1   | N/A | 1           | 0  | 0  | 1                    | 1   | 1   | 1   | 9            | 12             | 0.75  | High-moderate |
| Baselyous, 2019      | 0        | 1  | N/A | 1   | 2   | N/A | 1           | 0  | 1  | 0                    | N/A | N/A | 0   | 6            | 11             | 0.55  | Low-moderate  |
| Beauséjour, 2015     | 0        | 2  | 1   | N/A | 1   | 1   | 0           | 0  | 0  | 1                    | 1   | 1   | 1   | 9            | 13             | 0.69  | High-moderate |
| Bello, 2019          | 0        | 1  | 1   | 1   | 2   | N/A | 1           | 0  | 1  | 1                    | 1   | 0   | 1   | 10           | 14             | 0.71  | High-moderate |
| Bernier, 2018        | 0        | 2  | 1   | 1   | N/A | N/A | 1           | 0  | 0  | 1                    | 0   | 0   | 1   | 7            | 12             | 0.54  | Low-moderate  |
| Beyea, 2018          | 0        | 2  | 1   | 1   | N/A | N/A | 1           | 0  | 0  | 1                    | 1   | 1   | 1   | 9            | 12             | 0.69  | High-moderate |
| Birk-Urovitz, 2017   | 1        | 2  | 1   | N/A | 1   | N/A | 1           | 1  | 0  | 1                    | 1   | 1   | 0   | 10           | 12             | 0.83  | Strong        |
| Black, 2018          | 0        | 1  | 1   | 1   | N/A | N/A | 1           | 0  | 1  | 1                    | 1   | 0   | 0   | 7            | 12             | 0.58  | Low-moderate  |
| Bonafide, 2020       | 0        | 1  | 1   | 1   | N/A | N/A | 1           | 1  | 1  | 1                    | 1   | 1   | 1   | 10           | 12             | 0.83  | Strong        |
| Booth, 2018          | 0        | 2  | 1   | 1   | 1   | N/A | 1           | 0  | 0  | 1                    | 1   | 1   | 0   | 9            | 13             | 0.69  | High-moderate |
| Bouck, 2018          | 0        | 2  | 1   | 1   | 1   | N/A | 1           | 0  | 0  | 1                    | 1   | 1   | 0   | 9            | 14             | 0.64  | Low-moderate  |
| Bouck, 2019          | 0        | 2  | 1   | 1   | 1   | N/A | 1           | 0  | 0  | 1                    | 1   | 1   | 1   | 10           | 13             | 0.77  | High-moderate |
| Brown, 2017          | 0        | 1  | 1   | 1   | N/A | N/A | 1           | 0  | 0  | 1                    | N/A | N/A | 0   | 5            | 11             | 0.45  | Weak          |
| Brundage, 2013       | 1        | 2  | 1   | N/A | 1   | N/A | 1           | 0  | 1  | 1                    | 1   | 1   | 1   | 11           | 12             | 0.92  | Strong        |
| Chin, 2016           | 0        | 2  | 1   | N/A | 1   | N/A | 1           | 1  | 1  | 1                    | 1   | 1   | 0   | 10           | 12             | 0.83  | Strong        |

| Cross Sectional Tool | Sampling |    |     |     |     |     | Measurement |    |    | Statistical Analysis |     |     |     | Total Points | Maximum Points | Score | Quality       |
|----------------------|----------|----|-----|-----|-----|-----|-------------|----|----|----------------------|-----|-----|-----|--------------|----------------|-------|---------------|
| Author, Year         | Q1       | Q2 | Q3  | Q4  | Q5  | Q6  | Q7          | Q8 | Q9 | Q10                  | Q11 | Q12 | Q13 |              |                |       |               |
| CIHI, 2009           | 1        | 2  | 0   | 1   | 1   | 1   | 0           | 0  | 0  | 1                    | 1   | 1   | 1   | 10           | 15             | 0.67  | Low-moderate  |
| CIHI, 2011           | 0        | 2  | 0   | 0   | 1   | N/A | 1           | 0  | 0  | 1                    | 0   | 0   | 0   | 5            | 14             | 0.36  | Weak          |
| CIHI, 2014           | 0        | 2  | 0   | N/A | 1   | N/A | 1           | 0  | 0  | 1                    | N/A | 0   | 0   | 5            | 11             | 0.45  | Weak          |
| CIHI, 2017           | 0        | 1  | 0   | 0   | 1   | N/A | 1           | 0  | 0  | 1                    | 0   | 0   | 1   | 5            | 12             | 0.42  | Weak          |
| CIHI, 2018           | 0        | 2  | 0   | N/A | 1   | N/A | 1           | 0  | 0  | 1                    | 1   | 1   | 0   | 7            | 12             | 0.58  | Low-moderate  |
| Clemens, 2016        | 0        | 2  | 1   | 1   | N/A | N/A | 1           | 0  | 0  | 1                    | N/A | N/A | 1   | 7            | 11             | 0.64  | Low-moderate  |
| Cohen, 2019          | 0        | 1  | 1   | 1   | 0   | N/A | 1           | 0  | 0  | 1                    | 1   | 1   | 0   | 7            | 14             | 0.50  | Low-moderate  |
| CPAC, 2017           | 0        | 2  | 0   | N/A | 1   | N/A | 1           | 0  | 0  | 1                    | N/A | 0   | 0   | 5            | 11             | 0.45  | Weak          |
| Diamant, 2019        | 0        | 1  | 1   | 1   | 1   | N/A | 1           | 0  | 0  | 1                    | 1   | 1   | 1   | 9            | 14             | 0.64  | Low-moderate  |
| Eddy, 2013           | 1        | 2  | N/A | N/A | 1   | N/A | 1           | 0  | 0  | 1                    | N/A | N/A | 0   | 6            | 9              | 0.67  | High-moderate |
| Emery, 2013          | 0        | 1  | N/A | N/A | 1   | N/A | 1           | 0  | 1  | N/A                  | N/A | N/A | 0   | 4            | 8              | 0.5   | Weak          |
| Findlay, 2010        | 0        | 2  | 1   | N/A | 1   | N/A | 1           | 0  | 0  | 1                    | 1   | 0   | 0   | 7            | 12             | 0.58  | Low-moderate  |
| Fortin, 2014         | 0        | 0  | 1   | N/A | 1   | 0   | 0           | 0  | 0  | 1                    | N/A | N/A | 0   | 3            | 11             | 0.27  | Weak          |
| Gagnon, 2020         | 0        | 1  | 1   | 1   | 1   | N/A | 1           | 0  | 0  | 1                    | 1   | 1   | 0   | 8            | 14             | 0.57  | Low-moderate  |
| Gasmi 2017           | 0        | 1  | 1   | 1   | N/A | 1   | 1           | 0  | 0  | 1                    | 0   | 1   | 1   | 8            | 13             | 0.62  | Weak          |
| Gill, 2017           | 0        | 2  | 1   | N/A | 1   | N/A | 1           | 0  | 1  | 1                    | N/A | 1   | 1   | 9            | 11             | 0.82  | Strong        |
| Greenberg, 2016      | 0        | 1  | N/A | N/A | 1   | N/A | 1           | 0  | 0  | 1                    | N/A | N/A | 0   | 4            | 9              | 0.44  | Weak          |
| Gupta, 2012          | 0        | 0  | N/A | N/A | 1   | 1   | 0           | 0  | 0  | 1                    | N/A | 1   | 0   | 4            | 11             | 0.36  | Weak          |
| Guttman, 2011        | 0        | 2  | 0   | N/A | 1   | N/A | 1           | 0  | 0  | 1                    | N/A | 0   | 1   | 6            | 11             | 0.55  | Low-moderate  |
| Harmouch, 2018       | 0        | 1  | 1   | 1   | 0   | 1   | 0           | 0  | 1  | 1                    | 1   | 1   | 0   | 8            | 15             | 0.53  | Low-moderate  |
| Hinther, 2016        | 0        | 2  | 1   | N/A | 1   | N/A | 1           | 0  | 0  | 1                    | 1   | N/A | 0   | 7            | 11             | 0.64  | Low-moderate  |
| HQO, 2011            | 0        | 1  | 0   | 0   | 1   | 0   | 1           | 0  | 0  | 1                    | 0   | 0   | 0   | 4            | 15             | 0.27  | Weak          |
| Iaboni, 2019         | 0        | 2  | 1   | 1   | 1   | N/A | 1           | 0  | 1  | 1                    | 1   | 0   | 0   | 9            | 14             | 0.64  | Low-moderate  |
| Kandalam, 2020       | 0        | 2  | N/A | 1   | 0   | N/A | 1           | 0  | 1  | 1                    | N/A | N/A | N/A | 6            | 10             | 0.60  | Low-moderate  |
| Kapral, 2011         | 1        | 2  | 1   | N/A | 1   | N/A | 1           | 1  | 0  | 1                    | 0   | 0   | 1   | 9            | 12             | 0.75  | High-moderate |

| Cross Sectional Tool | Sampling |    |     |     |     |     | Measurement |    |    | Statistical Analysis |     |     |     | Total Points | Maximum Points | Score | Quality       |
|----------------------|----------|----|-----|-----|-----|-----|-------------|----|----|----------------------|-----|-----|-----|--------------|----------------|-------|---------------|
| Author, Year         | Q1       | Q2 | Q3  | Q4  | Q5  | Q6  | Q7          | Q8 | Q9 | Q10                  | Q11 | Q12 | Q13 |              |                |       |               |
| Khadilkar, 2014      | 0        | 2  | N/A | N/A | 1   | N/A | 1           | 1  | 0  | 1                    | N/A | 1   | 0   | 7            | 10             | 0.70  | High-moderate |
| Kirkham, 2015        | 0        | 1  | 1   | 1   | 1   | N/A | 1           | 0  | 1  | 1                    | 1   | 1   | 0   | 9            | 14             | 0.64  | Low-moderate  |
| Kirkham, 2016        | 0        | 2  | 1   | 1   | 1   | N/A | 1           | 0  | 0  | 1                    | 1   | 1   | 0   | 9            | 14             | 0.64  | Low-moderate  |
| Landry, 2011         | 0        | 1  | 1   | 1   | N/A | N/A | 1           | 1  | 0  | 1                    | 1   | 1   | 1   | 9            | 12             | 0.75  | High-moderate |
| Liddy, 2012          | 1        | 2  | 1   | N/A | 1   | N/A | 1           | 1  | 0  | 1                    | 1   | 1   | 0   | 10           | 12             | 0.83  | Strong        |
| Marin, 2020          | 0        | 2  | 1   | 1   | 2   | N/A | 1           | 0  | 0  | 1                    | 1   | 0   | 0   | 9            | 12             | 0.75  | High-moderate |
| McAlister, 2018      | 0        | 1  | 1   | 1   | 1   | N/A | 1           | 0  | 0  | 1                    | 1   | 1   | 0   | 8            | 14             | 0.57  | Low-moderate  |
| McCracken, 2017      | 1        | 1  | 1   | 1   | 1   | N/A | 1           | 0  | 0  | 1                    | 1   | 1   | 1   | 10           | 14             | 0.71  | High-moderate |
| McDonald, 2012       | 0        | 1  | 1   | N/A | 1   | 1   | 0           | 0  | 1  | 1                    | 1   | 1   | 0   | 8            | 13             | 0.62  | Low-moderate  |
| McDonald, 2011       | 0        | 1  | 1   | N/A | 1   | 1   | 0           | 0  | 0  | 1                    | 1   | 1   | 0   | 7            | 13             | 0.54  | Low-moderate  |
| McKenna, 2015        | 0        | 2  | 1   | N/A | 1   | N/A | 1           | 0  | 0  | 1                    | 0   | 1   | 0   | 7            | 12             | 0.58  | Low-moderate  |
| McKinnon, 2019       | 0        | 1  | 1   | 1   | 1   | N/A | 1           | 0  | 0  | 1                    | 1   | 1   | 0   | 8            | 14             | 0.57  | Low-moderate  |
| Morgan, 2016         | 0        | 1  | N/A | N/A | 1   | N/A | 1           | 0  | 0  | N/A                  | N/A | N/A | 0   | 3            | 8              | 0.38  | Weak          |
| Olson, 2014          | 0        | 2  | 1   | 1   | 1   | N/A | 1           | 0  | 0  | 1                    | 1   | 1   | 0   | 9            | 14             | 0.64  | Low-moderate  |
| Panju, 2011          | 0        | 1  | N/A | N/A | 1   | N/A | 1           | 1  | 0  | 1                    | N/A | N/A | 0   | 5            | 9              | 0.56  | Low-moderate  |
| Pasricha, 2018       | 0        | 2  | 1   | 1   | 0   | N/A | 1           | 0  | 0  | 1                    | 0   | 0   | 0   | 6            | 14             | 0.43  | Weak          |
| Pendrith, 2017       | 0        | 1  | 1   | 1   | N/A | N/A | 1           | 0  | 1  | 1                    | 1   | 1   | 0   | 8            | 12             | 0.67  | High-moderate |
| Remfry, 2015         | 0        | 1  | 1   | 1   | 1   | N/A | 1           | 1  | 0  | 1                    | 1   | 1   | 0   | 9            | 14             | 0.64  | Low-moderate  |
| Riddell, 2017        | 0        | 2  | 1   | 1   | 0   | N/A | 1           | 0  | 1  | 1                    | 1   | 1   | 0   | 9            | 14             | 0.64  | Low-moderate  |
| Rigby, 2017          | 0        | 1  | 1   | N/A | 1   | N/A | 1           | 0  | 0  | 1                    | 1   | 1   | 0   | 7            | 12             | 0.58  | Low-moderate  |
| Roux, 2020           | 0        | 2  | 1   | 1   | 2   | N/A | 1           | 0  | 0  | 1                    | 1   | 1   | 0   | 11           | 12             | 0.92  | Strong        |
| Sauro 2019           | 0        | 1  | 1   | 1   | 2   | 1   | 1           | 1  | 1  | 1                    | 1   | 1   | 0   | 12           | 15             | 0.80  | Strong        |

| Cross Sectional Tool | Sampling |    |     |     |     |     | Measurement |    |    | Statistical Analysis |     |     |     | Total Points | Maximum Points | Score | Quality       |
|----------------------|----------|----|-----|-----|-----|-----|-------------|----|----|----------------------|-----|-----|-----|--------------|----------------|-------|---------------|
| Author, Year         | Q1       | Q2 | Q3  | Q4  | Q5  | Q6  | Q7          | Q8 | Q9 | Q10                  | Q11 | Q12 | Q13 |              |                |       |               |
| Shurrab, 2017        | 0        | 1  | 1   | N/A | 1   | N/A | 1           | 0  | 0  | 1                    | 1   | 1   | 0   | 7            | 12             | 0.58  | Low-moderate  |
| Silverman, 2017      | 0        | 1  | 1   | N/A | 1   | N/A | 1           | 0  | 0  | 1                    | 1   | 1   | 0   | 7            | 12             | 0.58  | Low-moderate  |
| Simos, 2015          | 0        | 2  | 1   | N/A | 1   | N/A | 1           | 0  | 0  | 1                    | 1   | 1   | 1   | 9            | 12             | 0.75  | High-moderate |
| Singer, 2018         | 0        | 2  | 1   | 1   | 1   | N/A | 1           | 0  | 0  | 1                    | 1   | 1   | 1   | 10           | 14             | 0.71  | High-moderate |
| Spradbrow, 2016      | 0        | 1  | 1   | N/A | 1   | N/A | 1           | 1  | 0  | 1                    | 1   | 1   | 0   | 8            | 12             | 0.67  | High-moderate |
| Srigley, 2013        | 0        | 1  | N/A | N/A | 1   | N/A | 1           | 0  | 0  | N/A                  | N/A | N/A | 0   | 3            | 8              | 0.38  | Weak          |
| Symonds, 2018        | 0        | 2  | 1   | 1   | 1   | N/A | 1           | 0  | 1  | 1                    | 1   | 1   | 0   | 10           | 14             | 0.71  | High-moderate |
| Taggar, 2016         | 0        | 2  | 1   | N/A | 1   | N/A | 1           | 0  | 0  | 1                    | 1   | 0   | 0   | 7            | 12             | 0.58  | Low-moderate  |
| Teoh, 2013           | 0        | 1  | 1   | 1   | 1   | 0   | 1           | 0  | 0  | 1                    | 1   | 1   | 1   | 9            | 15             | 0.60  | Low-moderate  |
| Thomas, 2020         | 0        | 2  | 1   | 1   | N/A | N/A | 1           | 0  | 0  | 1                    | 1   | 1   | 1   | 9            | 11             | 0.82  | Strong        |
| Tinmouth, 2016       | 0        | 1  | 1   | N/A | 1   | N/A | 1           | 1  | 0  | 1                    | 1   | 0   | 1   | 8            | 12             | 0.67  | High-moderate |
| Trenaman, 2018       | 0        | 1  | 1   | 1   | 1   | N/A | 1           | 0  | 0  | 1                    | 1   | 1   | 0   | 8            | 14             | 0.57  | Low-moderate  |
| Verma, 2020          | 0        | 1  | 1   | 1   | 1   | N/A | 1           | 1  | 1  | 1                    | 1   | 1   | 1   | 11           | 12             | 0.92  | Strong        |
| Wanis, 2013          | 0        | 1  | 1   | N/A | 1   | N/A | 1           | 0  | 0  | 1                    | N/A | N/A | 0   | 5            | 10             | 0.50  | Weak          |
| Wirth, 2020          | 0        | 1  | 1   | 1   | 1   | N/A | 1           | 0  | 0  | 1                    | 1   | 0   | 1   | 9            | 12             | 0.75  | High-moderate |
| Wong, 2017           | 0        | 1  | 1   | 1   | 1   | 0   | 1           | 0  | 0  | 1                    | 1   | 0   | 0   | 7            | 15             | 0.47  | Weak          |

**Notes:**

- Q1: Probabilistic sample used (max 1)
- Q2: Representative (max 2 points)
- Q3: Sample size appropriate for power (max 1)
- Q4: Sample drawn >1 site (max 1)
- Q5: Groups in the study (max 2 points)
- Q6: Response rate >50% (max 1)
- Q7: DV measurement (max 1)
- Q8: DV reliability (max 1)
- Q9: DV validity (max 1)
- Q10: Appropriate tests used (max 1)
- Q11: p values reported (max 1)
- Q12: CI reported (max 1)

Q13: 4. Missing data managed appropriately (max 1)

**Quality Scores:**

$\leq 0.50$ =weak methodological quality

0.51-0.65=low moderate methodological quality

0.66-.079=high moderate methodological quality

$\geq .80$ =strong methodological quality

## Appendix 4: Quality Appraisal

### 4.2 Case Series

| Author, Year       | Q1  | Q2  | Q3  | Q4 | Q5 | Q6  | Q7  | Q8  | Q9  | Q10 | Overall Appraisal | Comments     |
|--------------------|-----|-----|-----|----|----|-----|-----|-----|-----|-----|-------------------|--------------|
| Andrade, 2020      | Yes | Yes | Yes | No | No | Yes | Yes | Yes | Yes | N/A | Include           | Good Quality |
| Papastergiou, 2019 | Yes | Yes | Yes | No | No | Yes | Yes | Yes | Yes | N/A | Include           | Good Quality |

#### Notes:

Q1: Were there clear criteria for inclusion in the case series?

Q2: Was the condition measured in a standard, reliable way for all participants included in the case series?

Q3: Were valid methods used for identification of the condition for all participants included in the case series?

Q4: Did the case series have consecutive inclusion of participants?

Q5: Did the case series have complete inclusion of participants?

Q6: Was there clear reporting of the demographics of the participants in the study?

Q7: Was there clear reporting of clinical information of the participants?

Q8: Were the outcomes or follow up results of cases clearly reported?

Q9: Was there clear reporting of the presenting site(s)/clinic(s) demographic information?

Q10: Was statistical analysis appropriate?

#### JBI Overall appraisal

Include

Exclude

Seek further information

#### Overall appraisal - modified for this review

Include: Good Quality ('Yes' >5 out of 10) = Strong methodological quality

Include: Fair Quality ('Yes' equal to or less than 5 out of 10) = Moderate methodological quality

Include: Poor Quality ('Yes' less than 5 out of 10) = Weak methodological quality

## Appendix 4: Quality Appraisal

### 4.3 Quasi Experimental

| Author, Year    | Q1  | Q2      | Q3      | Q4  | Q5  | Q6      | Q7  | Q8  | Q9      | Overall Appraisal | Comments     |
|-----------------|-----|---------|---------|-----|-----|---------|-----|-----|---------|-------------------|--------------|
| Arbel, 2016     | Yes | Yes     | Yes     | No  | Yes | N/A     | N/A | Yes | Yes     | Include           | Good Quality |
| DeSilva, 2018   | Yes | No      | Yes     | No  | Yes | N/A     | Yes | N/A | Yes     | Include           | Fair Quality |
| Henderson, 2020 | Yes | Yes     | Yes     | No  | Yes | Yes     | Yes | Yes | N/A     | Include           | Good Quality |
| Irfan, 2015     | Yes | Unclear | Unclear | Yes | Yes | Unclear | Yes | Yes | Unclear | Include           | Fair Quality |
| Keller, 2019    | Yes | No      | Yes     | No  | Yes | N/A     | Yes | No  | Yes     | Include           | Fair Quality |
| Ma, 2017        | Yes | Yes     | Yes     | No  | Yes | N/A     | N/A | Yes | Yes     | Include           | Good Quality |
| MacMillan, 2018 | Yes | No      | Yes     | Yes | Yes | N/A     | Yes | N/A | Yes     | Include           | Good Quality |
| Sun, 2015       | Yes | No      | Unclear | Yes | Yes | N/A     | Yes | N/A | Yes     | Include           | Fair Quality |
| Walker, 2020    | Yes | Yes     | Yes     | No  | Yes | Yes     | Yes | Yes | Yes     | Include           | Good Quality |
| Welk, 2018      | Yes | No      | No      | No  | Yes | Unclear | No  | N/A | Yes     | Include           | Poor Quality |

#### Notes:

Q1: The 'cause' and the 'effect' in the study was clear (i.e. there was no confusion about which variable comes first)

Q2: The participants included in any comparisons were similar

Q3: The participants included in any comparisons received similar treatment/care, other than the exposure or intervention of interest

Q4: There was a control group

Q5: There were multiple measurements of the outcome both pre and post the intervention/exposure

Q6: There was follow up complete and the differences between groups were adequately described and analyzed

Q7: Outcomes of participants included in any comparison were measured in the same way

Q8: Outcomes were measured in a reliable way

Q9: Appropriate statistical analysis was used

#### JBI Overall appraisal

Include

Exclude

Seek further information

#### Overall appraisal - modified for this review

Include: Good Quality ('Yes' >5 out of 10) = Strong methodological quality

Include: Fair Quality ('Yes' equal to or less than 5 out of 10) = Moderate methodological quality

Include: Poor Quality ('Yes' less than 5 out of 10) = Weak methodological quality

## Appendix 4: Quality Appraisal

### 4.4 Cohort/Before-After

| Cohort/Before-After Tool | Sample |    |    | Design | Control of Confounders |     | Data Collection and Outcome Measurement |    |    | Statistical Analysis |     |     |     | Drop-out | Total Points | Maximum Points | Score | Quality       |
|--------------------------|--------|----|----|--------|------------------------|-----|-----------------------------------------|----|----|----------------------|-----|-----|-----|----------|--------------|----------------|-------|---------------|
|                          | Q1     | Q2 | Q3 |        | Q4                     | Q5  | Q6                                      | Q7 | Q8 | Q9                   | Q10 | Q11 | Q12 |          |              |                |       |               |
| Aaron, 2017              | 1      | 1  | 1  | N/A    | 1                      | N/A | 1                                       | 0  | 0  | 1                    | 1   | 1   | 0   | 1        | 8            | 14             | 0.57  | Low-moderate  |
| Abdul-Razzak, 2019       | 0      | 0  | 1  | N/A    | N/A                    | N/A | 1                                       | 0  | 0  | 1                    | 1   | 0   | 1   | 0        | 5            | 12             | 0.42  | Weak          |
| Alkhiari, 2018           | 0      | 1  | 1  | N/A    | N/A                    | N/A | 1                                       | 0  | 0  | 1                    | 1   | 0   | 0   | 1        | 6            | 12             | 0.50  | Weak          |
| Andrew, 2018             | 0      | 1  | 1  | 1      | 1                      | 0   | 1                                       | 0  | 0  | 1                    | 1   | 1   | 0   | 0        | 8            | 18             | 0.44  | Weak          |
| Assmus, 2019             | 0      | 1  | 1  | 0      | 2                      | 2   | 1                                       | 0  | 0  | 1                    | 1   | 1   | 0   | 0        | 10           | 18             | 0.56  | Low-moderate  |
| Bainey, 2019             | 0      | 1  | 2  | 2      | 2                      | 0   | 1                                       | 0  | 1  | 1                    |     | 1   | N/A | 0        | 12           | 17             | 0.71  | High-moderate |
| Barker, 2018             | 0      | 1  | 2  | N/A    | N/A                    | N/A | 1                                       | 1  | 1  | 1                    | 0   | 1   | 1   | 1        | 10           | 12             | 0.83  | Strong        |
| Bellai-Dussault, 2020    | 0      | 1  | 2  | 2      | 2                      | 0   | 1                                       | 0  | 1  | 1                    | 0   | N/A | 0   | 0        | 10           | 17             | 0.59  | Low-moderate  |
| Bhatia, 2017             | 0      | 0  | 1  | N/A    | N/A                    | N/A | 1                                       | 0  | 0  | 1                    | 1   | 1   | 1   | 0        | 6            | 12             | 0.5   | Weak          |
| Bhatt, 2018              | 0      | 0  | 1  | N/A    | 1                      | N/A | 1                                       | 0  | 0  | 1                    | 1   | 1   | 1   | 0        | 7            | 14             | 0.5   | Weak          |
| Bisch, 2018              | 0      | 1  | 2  | 2      | 1                      | 2   | 1                                       | 0  | 0  | 1                    | 1   | 1   | 0   | 0        | 12           | 18             | 0.67  | High-moderate |
| Bischof, 2015            | 0      | 1  | 1  | N/A    | 1                      | N/A | 1                                       | 0  | 0  | 1                    | 1   | 1   | 0   | N/A      | 7            | 13             | 0.54  | Low-moderate  |
| Bowker, 2017             | 1      | 0  | 1  | N/A    | N/A                    | N/A | 1                                       | 0  | 0  | 1                    | 1   | 1   | 0   | 0        | 6            | 12             | 0.5   | Weak          |
| Brimble, 2020            | 0      | 1  | 1  | 1      | 1                      | 0   | 1                                       | 0  | 1  | 1                    | 1   | 1   | 1   | 0        | 10           | 18             | 0.56  | Low-moderate  |
| Chan, 2019               | 0      | 0  | 1  | N/A    | N/A                    | N/A | 1                                       | 0  | 0  | 1                    | 1   | 1   | 1   | 0        | 7            | 12             | 0.58  | Low-moderate  |
| Chen, 2019               | 0      | 0  | 1  | N/A    | N/A                    | N/A | 1                                       | 0  | 0  | 1                    | 0   | 0   | 1   | 0        | 5            | 12             | 0.42  | Weak          |
| Cheng, 2019              | 0      | 1  | 1  | 1      | 2                      | 2   | 1                                       | 0  | 1  | 1                    | 1   | 1   | 0   | 0        | 13           | 18             | 0.72  | High-moderate |



| Cohort/Before-After Tool | Sample |     |    | Design | Control of Confounders |     | Data Collection and Outcome Measurement |    |    | Statistical Analysis |     |     |     | Drop-out | Total Points | Maximum Points | Score | Quality       |
|--------------------------|--------|-----|----|--------|------------------------|-----|-----------------------------------------|----|----|----------------------|-----|-----|-----|----------|--------------|----------------|-------|---------------|
|                          | Q1     | Q2  | Q3 |        | Q4                     | Q5  | Q6                                      | Q7 | Q8 | Q9                   | Q10 | Q11 | Q12 |          |              |                |       |               |
| Donovan, 2016            | 0      | 0   | 1  | N/A    | N/A                    | N/A | 1                                       | 0  | 0  | 1                    | 1   | 1   | 1   | 0        | 7            | 12             | 0.58  | Low-moderate  |
| Elegbede, 2020           | 0      | 1   | 1  | 0      | 2                      | 0   | 1                                       | 0  | 1  | 1                    | 1   | 1   | 0   | 0        | 9            | 18             | 0.50  | Weak          |
| Eskicioglu, 2015         | 0      | 1   | 1  | N/A    | 1                      | 0   | 1                                       | 0  | 0  | 1                    | 1   | 1   | 0   | N/A      | 7            | 15             | 0.47  | Weak          |
| Falk, 2019               | 0      | 0   | 1  | N/A    | N/A                    | N/A | 1                                       | 0  | 0  | 1                    | 0   | 0   | 0   | 0        | 3            | 12             | 0.25  | Weak          |
| Feldman, 2013            | 0      | 1   | 2  | N/A    | N/A                    | N/A | 0                                       | 0  | 0  | 1                    | 1   | 1   | 1   | 1        | 8            | 12             | 0.67  | High-moderate |
| Ferguson, 2019           | 0      | 1   | 1  | 0      | 1                      | 0   | 1                                       | 0  | 1  | 1                    | 1   | 0   | 0   | 0        | 7            | 18             | 0.39  | Weak          |
| Gotto, 2015              | 0      | 0   | 1  | N/A    | N/A                    | N/A | 1                                       | 0  | 0  | 1                    | 1   | 1   | 0   | 0        | 5            | 12             | 0.42  | Weak          |
| Gotto, 2016              | 0      | 1   | 2  | N/A    | N/A                    | N/A | 1                                       | 0  | 0  | 1                    | 1   | 1   | 0   | N/A      | 7            | 11             | 0.64  | Low-moderate  |
| Greiver, 2020            | 0      | 1   | 1  | 2      | 0                      | 0   | 1                                       | 0  | 1  | 1                    | 1   | 0   | 1   | 0        | 9            | 18             | 0.50  | Weak          |
| Hall, 2010               | 0      | 0   | 2  | N/A    | N/A                    | N/A | 1                                       | 0  | 0  | 1                    | 1   | 0   | 1   | N/A      | 6            | 11             | 0.55  | Low-moderate  |
| Hall, 2012               | 1      | 0   | 2  | N/A    | N/A                    | N/A | 1                                       | 0  | 0  | 1                    | 1   | 1   | 0   | N/A      | 7            | 11             | 0.64  | Low-moderate  |
| Hall, 2015               | 0      | 1   | 2  | N/A    | N/A                    | N/A | 1                                       | 0  | 0  | 1                    | 0   | 0   | 0   | N/A      | 5            | 11             | 0.45  | Weak          |
| Hall, 2016               | 0      | 0   | 2  | N/A    | N/A                    | N/A | 1                                       | 0  | 0  | 1                    | 0   | 0   | 0   | N/A      | 4            | 11             | 0.36  | Weak          |
| Hall, 2017               | 1      | N/A | 2  | N/A    | N/A                    | N/A | 1                                       | 0  | 0  | N/A                  | N/A | N/A | 0   | N/A      | 4            | 7              | 0.57  | Low-moderate  |
| Hall, 2017               | 0      | 0   | 2  | N/A    | N/A                    | N/A | 1                                       | 0  | 0  | 1                    | 0   | 0   | 0   | N/A      | 4            | 11             | 0.36  | Weak          |
| Harris, 2013             | 1      | 1   | 1  | 1      | 1                      | 2   | 1                                       | 0  | 0  | 1                    | 1   | 0   | 0   | N/A      | 10           | 17             | 0.59  | Low-moderate  |
| Hayward, 2020            | 0      | 1   | 1  | 1      | 1                      | 2   | 1                                       | 0  | 1  | 1                    | 1   | 1   | 0   | 1        | 12           | 18             | 0.67  | Low-moderate  |
| Ho, 2017                 | 0      | 1   | 2  | N/A    | N/A                    | N/A | 1                                       | 1  | 0  | 1                    | 1   | 1   | 1   | N/A      | 9            | 11             | 0.82  | Strong        |
| Hsu, 2020                | 0      | 1   | 1  | 0      | 2                      | 2   | 1                                       | 0  | 1  | 1                    | 0   | 1   | 1   | 0        | 11           | 18             | 0.61  | Low-moderate  |
| Kahn, 2012               | 0      | N/A | 1  | N/A    | N/A                    | N/A | 1                                       | 0  | 0  | N/A                  | N/A | N/A | N/A | 1        | 3            | 7              | 0.43  | Weak          |

| Cohort/Before-After Tool | Sample |    |    | Design | Control of Confounders |     | Data Collection and Outcome Measurement |    |    | Statistical Analysis |     |     |     | Drop-out | Total Points | Maximum Points | Score | Quality       |
|--------------------------|--------|----|----|--------|------------------------|-----|-----------------------------------------|----|----|----------------------|-----|-----|-----|----------|--------------|----------------|-------|---------------|
|                          | Q1     | Q2 | Q3 |        | Q4                     | Q5  | Q6                                      | Q7 | Q8 | Q9                   | Q10 | Q11 | Q12 |          |              |                |       |               |
| Khoury, 2019             | 0      | 1  | 1  | 1      | 2                      | 0   | 1                                       | 0  | 1  | 1                    | N/A | N/A | 0   | 0        | 8            | 16             | 0.50  | Weak          |
| Kurdyak, 2017            | 0      | 1  | 2  | N/A    | N/A                    | N/A | 1                                       | 1  | 0  | 1                    | 1   | 1   | 0   | N/A      | 8            | 11             | 0.73  | High-moderate |
| Lake, 2020               | 0      | 1  | 1  | 0      | 1                      | 2   | 1                                       | 0  | 0  | 1                    | 0   | 1   | 0   | 0        | 8            | 18             | 0.44  | Weak          |
| Lee, 2011                | 0      | 0  | 2  | N/A    | N/A                    | N/A | 1                                       | 0  | 0  | 1                    | N/A | 0   | 1   | N/A      | 5            | 10             | 0.5   | Weak          |
| Maclagan, 2017           | 0      | 1  | 2  | N/A    | N/A                    | N/A | 1                                       | 0  | 0  | 1                    | 1   | 1   | 0   | N/A      | 7            | 11             | 0.64  | Low-moderate  |
| Martel, 2018             | 0      | 0  | 1  | N/A    | N/A                    | N/A | 1                                       | 0  | 0  | 1                    | 0   | 1   | 0   | 0        | 4            | 12             | 0.33  | Weak          |
| Martin, 2018             | 0      | 0  | 2  | 2      | 1                      | 2   | 1                                       | 0  | 0  | 1                    | 1   | 1   | 1   | 0        | 12           | 18             | 0.67  | High-moderate |
| Martin, 2015             | 0      | 1  | 1  | 1      | 0                      | 0   | 1                                       | 0  | 0  | 1                    | 1   | 1   | 0   | N/A      | 7            | 17             | 0.41  | Weak          |
| McBride, 2019            | 0      | 0  | 1  | N/A    | N/A                    | N/A | 1                                       | 0  | 0  | 1                    | 0   | 0   | 0   | 0        | 4            | 12             | 0.33  | Weak          |
| Mohareb, 2015            | 0      | 1  | 2  | N/A    | N/A                    | N/A | 1                                       | 1  | 1  | 1                    | 1   | 0   | 1   | N/A      | 9            | 11             | 0.82  | Strong        |
| Morgen, 2015             | 1      | 1  | 2  | N/A    | N/A                    | N/A | 1                                       | 0  | 0  | 1                    | 0   | 1   | 0   | N/A      | 7            | 11             | 0.64  | Low-moderate  |
| Pardhan, 2019            | 0      | 0  | 2  | N/A    | N/A                    | N/A | 1                                       | 0  | 0  | 1                    | 0   | 0   | 0   | N/A      | 4            | 11             | 0.36  | Weak          |
| Pelletier, 2016          | 0      | 0  | 1  | N/A    | 1                      | N/A | 0                                       | 0  | 0  | 1                    | 1   | 1   | 1   | 1        | 7            | 14             | 0.5   | Weak          |
| Plitt, 2016              | 0      | 1  | 2  | N/A    | N/A                    | N/A | 1                                       | 0  | 0  | 1                    | 1   | 1   | 1   | N/A      | 8            | 11             | 0.73  | High-moderate |
| Price, 2019              | 0      | 0  | 2  | N/A    | 1                      | N/A | 1                                       | 1  | 0  | 1                    | 1   | 1   | 0   | 0        | 8            | 14             | 0.57  | Low-moderate  |
| Redwood, 2019            | 0      | 1  | 1  | N/A    | 1                      | N/A | 1                                       | 0  | 1  | 1                    | 1   | 0   | 1   | 1        | 9            | 14             | 0.64  | Low-moderate  |
| Rowe, 2018               | 0      | 1  | 2  | N/A    | 1                      | N/A | 0                                       | 0  | 0  | 1                    | 1   | 1   | 1   | 0        | 8            | 14             | 0.57  | Low-moderate  |
| Sadatsafvi, 2017         | 0      | 1  | 2  | N/A    | N/A                    | N/A | 1                                       | 1  | 1  | 1                    | 1   | 0   | 1   | N/A      | 9            | 11             | 0.82  | Strong        |
| Sanders, 2019            | 0      | 0  | 1  | N/A    | 0                      | N/A | 1                                       | 0  | 0  | 0                    | 1   | 0   | 1   | 1        | 5            | 14             | 0.36  | Weak          |
| Sawler, 2020             | 0      | 1  | 2  | 0      | 2                      | 2   | 1                                       | 0  | 1  | 1                    | 1   | 1   | 1   | 1        | 14           | 18             | 0.78  | High-moderate |

| Cohort/Before-After Tool | Sample |    |    | Design | Control of Confounders |     | Data Collection and Outcome Measurement |    |    | Statistical Analysis |     |     |     | Drop-out | Total Points | Maximum Points | Score | Quality       |
|--------------------------|--------|----|----|--------|------------------------|-----|-----------------------------------------|----|----|----------------------|-----|-----|-----|----------|--------------|----------------|-------|---------------|
|                          | Q1     | Q2 | Q3 |        | Q4                     | Q5  | Q6                                      | Q7 | Q8 | Q9                   | Q10 | Q11 | Q12 |          |              |                |       |               |
| Schuh, 2017              | 1      | 1  | 2  | N/A    | 1                      | N/A | 1                                       | 0  | 0  | 1                    | 1   | 1   | 0   | N/A      | 9            | 13             | 0.69  | High-moderate |
| Scovil, 2019             | 0      | 0  | 1  | 2      | 1                      | 0   | 1                                       | 0  | 0  | 1                    | 1   | 0   | 0   | 0        | 7            | 18             | 0.39  | Weak          |
| Sharma, 2019             | 0      | 1  | 2  | 0      | 1                      | 2   | 1                                       | 0  | 1  | 1                    | 1   | N/A | N/A | 0        | 10           | 16             | 0.63  | Low-moderate  |
| Shih, 2017               | 0      | 1  | 1  | N/A    | N/A                    | N/A | 1                                       | 1  | 1  | 1                    | 1   | 0   | 0   | N/A      | 7            | 11             | 0.64  | Low-moderate  |
| Siemens, 2020            | 0      | 1  | 2  | 2      | 1                      | 0   | 1                                       | 0  | 1  | 1                    | 1   | 1   | 0   | 0        | 11           | 18             | 0.61  | Low-moderate  |
| Silberberg, 2017         | 0      | 1  | 1  | N/A    | N/A                    | N/A | 1                                       | 0  | 0  | 1                    | 1   | 1   | 0   | N/A      | 6            | 11             | 0.55  | Low-moderate  |
| Skiffington, 2020        | 0      | 1  | 2  | 0      | 2                      | 2   | 1                                       | 0  | 1  | 1                    | 0   | 1   | 1   | 0        | 12           | 18             | 0.67  | High-moderate |
| Snodgrass, 2014          | 0      | 0  | 1  | 1      | 0                      | 0   | 1                                       | 0  | 0  | 1                    | N/A | 0   | 0   | N/A      | 4            | 16             | 0.25  | Weak          |
| Solbak, 2018             | 0      | 1  | 2  | N/A    | N/A                    | N/A | 0                                       | 0  | 0  | 1                    | 1   | 1   | 1   | N/A      | 7            | 11             | 0.64  | Low-moderate  |
| Somanader 2017           | 0      | 0  | 2  | N/A    | 1                      | N/A | 0                                       | 0  | 0  | 1                    | 1   | 0   | 1   | 0        | 6            | 14             | 0.43  | Weak          |
| Soril, 2019              | 0      | 1  | 1  | N/A    | 1                      | N/A | 1                                       | 0  | 0  | 1                    | 1   | 1   | 1   | N/A      | 8            | 13             | 0.62  | Low-moderate  |
| Steinberg, 2020          | 0      | 1  | 1  | 2      | 0                      | 2   | 1                                       | 0  | 1  | 1                    | 1   | 1   | 0   | 1        | 12           | 18             | 0.67  | High-moderate |
| Tharmaratnam (a.), 2020  | 0      | 1  | 1  | 0      | 2                      | 2   | 1                                       | 0  | 1  | 1                    | 1   | 1   | 0   | 0        | 11           | 18             | 0.61  | Low-moderate  |
| Vinturache, 2017         | 0      | 1  | 1  | N/A    | 1                      | N/A | 0                                       | 0  | 0  | 1                    | 1   | 1   | 1   | 1        | 8            | 14             | 0.57  | Low-moderate  |
| Vinturache 2019          | 0      | 0  | 1  | N/A    | 1                      | N/A | 0                                       | 0  | 0  | 1                    | 1   | 1   | 1   | 1        | 7            | 14             | 0.5   | Weak          |
| Vitale, 2020             | 0      | 1  | 2  | 1      | 2                      | 2   | 1                                       | 0  | 0  | 1                    | 1   | 1   | 1   | 0        | 13           | 18             | 0.72  | High-moderate |
| Weir, 2020               | 0      | 1  | 2  | 1      | 1                      | 2   | 1                                       | 0  | 0  | 1                    | 0   | 1   | 0   | 0        | 10           | 18             | 0.56  | Low-moderate  |

| Cohort/Before-After Tool | Sample |    |    | Design | Control of Confounders |    | Data Collection and Outcome Measurement |    |    | Statistical Analysis |     |     |     | Drop-out | Total Points | Maximum Points | Score | Quality       |
|--------------------------|--------|----|----|--------|------------------------|----|-----------------------------------------|----|----|----------------------|-----|-----|-----|----------|--------------|----------------|-------|---------------|
|                          | Q1     | Q2 | Q3 |        | Q4                     | Q5 | Q6                                      | Q7 | Q8 | Q9                   | Q10 | Q11 | Q12 |          |              |                |       |               |
| Wintemute, 2019          | 0      | 1  | 1  | 1      | 2                      | 2  | 1                                       | 0  | 0  | 1                    | 1   | 1   | 1   | 0        | 12           | 18             | 0.67  | High-moderate |

**Notes:**

- Q1: Probabilistic sample used
- Q2: Sample size appropriate for power
- Q3: Representative (max 2 points)
- Q4: Study design (max 2 points)
- Q5: Comparison strategy (max 2 points)
- Q6: Group comparisons (max 2 points)
- Q7: Dependent variable
- Q8: Reliability of dependent variable
- Q9: Validity of dependent variable
- Q10: Statistical test(s) appropriate
- Q11: p values reported
- Q12: Confidence intervals reported
- Q13: Missing data managed appropriately
- Q14: Attrition rate <30%

**Quality Scores:**

- ≤ 0.50=weak methodological quality
- 0.51-0.65=low moderate methodological quality
- 0.66-.079=high moderate methodological quality
- ≥.80=strong methodological quality

**Appendix 4: Quality Appraisal**  
4.5 Randomized Controlled Trial

| Author, Year                                                                                                                                                           | Barkun, 2013 | Bhatia, 2017   | Daley 2018     | Kirkham, 2020    | Martin (b.), 2018 | Minian, 2019     | Pai, 2013    | Scales, 2016   |
|------------------------------------------------------------------------------------------------------------------------------------------------------------------------|--------------|----------------|----------------|------------------|-------------------|------------------|--------------|----------------|
| 1. 1) Randomized                                                                                                                                                       | Yes          | No Information | Yes            | Yes              | Yes               | Yes              | Yes          | Yes            |
| 1. 2) Concealed                                                                                                                                                        | Yes          | No Information | Yes            | Yes              | Yes               | Yes              | Probable Yes | No Information |
| 1. 3) Suggested problem with the randomization process                                                                                                                 | Probable No  | No Information | Yes            | No Information   | No                | No               | Probable No  | No             |
| 1. 4) Risk-of-bias judgement                                                                                                                                           | Low          | Some concerns  | Some concerns  | Low risk of bias | Low               | Low risk of bias | Low          | Some concerns  |
| 2. 1) Participants aware of assigned intervention                                                                                                                      | Probable Yes | Yes            | No             | Yes              | No                | No               | Probable Yes | Probable Yes   |
| 2. 2) Carers and people delivering interventions aware of participants' assigned intervention                                                                          | Probable Yes | No             | Yes            | Yes              | No                | Yes              | Probable Yes | Probable Yes   |
| 2. 3) [If Y/PY/NI to 2. 1 or 2.2] Deviations from the intended intervention that arose because of the experimental context                                             | Probable No  | Yes            | Probable No    | Probable No      | N/A               | Probable No      | Probable No  | No information |
| 2. 4) [If Y/PY to 2. 3)] Deviations from the intended intervention balanced between groups                                                                             | N/A          | No             | N/A            | N/A              | N/A               | N/A              | N/A          | N/A            |
| 2.5 [If N/PN/NI to 2.4] Deviations likely affected the outcome                                                                                                         | N/A          | PY             | N/A            | N/A              | N/A               | N/A              | N/A          | N/A            |
| 2.6) Appropriate analysis estimated the effect of assignment to intervention                                                                                           | Yes          | Yes            | Probable No    | Yes              | Yes               | Yes              | Probable Yes | Probable Yes   |
| 2.7) [If N/PN/NI to 2.6] There was potential for a substnatial impact (on the result) of the failure to analyse participants in eh group to which they were randomized | N/A          | N/A            | No Information | N/A              | N/A               | N/A              | N/A          | N/A            |

| Author, Year                                                                                                                        | Barkun, 2013 | Bhatia, 2017 | Daley 2018 | Kirkham, 2020    | Martin (b.), 2018 | Minian, 2019     | Pai, 2013    | Scales, 2016   |
|-------------------------------------------------------------------------------------------------------------------------------------|--------------|--------------|------------|------------------|-------------------|------------------|--------------|----------------|
| 2.8) Risk-of-bias judgement                                                                                                         | Low Risk     | High Risk    | High Risk  | Low risk of bias | Low Risk          | Low risk of bias | Low Risk     | Some concerns  |
| 2. 1) Participants aware of assigned intervention during the trial                                                                  | n/a          | n/a          | n/a        | n/a              | n/a               | n/a              | n/a          | n/a            |
| 2. 2) Carers and people delivering interventions aware of participants' assigned intervention during the trial                      | n/a          | n/a          | n/a        | n/a              | n/a               | n/a              | n/a          | n/a            |
| 2. 3) [If Y/PY/NI to 2. 1 or 2.2] Important co-interventions were balanced across intervention groups                               | n/a          | n/a          | n/a        | n/a              | n/a               | n/a              | n/a          | n/a            |
| 2.4) Failures in implementing the intervention affected the outcome                                                                 | n/a          | n/a          | n/a        | n/a              | n/a               | n/a              | n/a          | n/a            |
| 2.5) Study participants adhered to the assigned intervention regimen                                                                | n/a          | n/a          | n/a        | n/a              | n/a               | n/a              | n/a          | n/a            |
| 2.6) [If N/PN/NI] to 2.5 OR Y/PY/NI to 2.4] An appropriate analysis was used to estimate the effect of adhering to the intervention | n/a          | n/a          | n/a        | n/a              | n/a               | n/a              | n/a          | n/a            |
| 2.7) Risk-of-bias judgement                                                                                                         | n/a          | n/a          | n/a        | n/a              | n/a               | n/a              | n/a          | n/a            |
| 2.8) Optional: The predicted direction of bias was due to deviations from intended interventions                                    | n/a          | n/a          | n/a        | n/a              | n/a               | n/a              | n/a          | n/a            |
| 3.1) Data for this outcome was available for all, or nearly all, participants randomized                                            | Yes          | Yes          | Yes        | Yes              | Yes               | No               | Probable Yes | Probable No    |
| 3.2) [If N/PN/NI to 3.1] There is evidence that result was not biased by missing outcome data                                       | N/A          | N/A          | N/A        | N/A              | N/A               | Probable Yes     | N/A          | No information |

| Author, Year                                                                                                         | Barkun, 2013 | Bhatia, 2017 | Daley 2018  | Kirkham, 2020    | Martin (b.), 2018 | Minian, 2019     | Pai, 2013    | Scales, 2016   |
|----------------------------------------------------------------------------------------------------------------------|--------------|--------------|-------------|------------------|-------------------|------------------|--------------|----------------|
| 3.3) [If N/PN/NI to 3.1]<br>Missingness in the outcome was dependent on its true value                               | N/A          | N/A          | N/A         | N/A              | N/A               | N/A              | N/A          | No information |
| 3.4) [If Y/PY/NI to 3.3] The proportions of missing outcome data differed between intervention groups                | N/A          | N/A          | N/A         | N/A              | N/A               | N/A              | N/A          | No information |
| 3.5) [If Y/PY/NI to 3.3] It was likely that missingness in the outcome depended on its true value                    | N/A          | N/A          | N/A         | N/A              | N/A               | N/A              | N/A          | Probable no    |
| 3.6) Risk-of-bias judgement                                                                                          | Low Risk     | Low Risk     | Low Risk    | Low risk of bias | Low Risk          | Low risk of bias | Low Risk     | Some concerns  |
| 4.1) The method of measuring the outcome was inappropriate                                                           | No           | No           | Probable No | No               | No                | No               | No           | No             |
| 4.2) The measurement of ascertainment of the outcome differed between intervention groups                            | No           | No           | No          | No               | No                | No               | No           | No             |
| 4.3) [If N/PN/NI to 4.1 and 4.2] The outcome assessors were aware of the intervention received by study participants | Probable Yes | No           | Yes         | Probable No      | No                | No               | Probable Yes | No             |
| 4.4) [If Y/PY/NI to 4.3] Assessment of the outcome was influenced by knowledge of intervention received              | Probable No  | N/A          | No          | N/A              | N/A               | N/A              | Probable No  | N/A            |
| 4.5) [If Y/PY/NI to 4.4] Likely that assessment of the outcome was influenced by knowledge of intervention received  | N/A          | N/A          | N/A         | N/A              | N/A               | N/A              | N/A          | N/A            |
| 4.6) Risk-of-bias judgement                                                                                          | Low Risk     | Low Risk     | Low Risk    | Low risk of bias | Low Risk          | Low risk of bias | Low Risk     | Low Risk       |

| Author, Year                                                                                                                                                                                     | Barkun, 2013     | Bhatia, 2017      | Daley 2018        | Kirkham, 2020    | Martin (b.), 2018 | Minian, 2019     | Pai, 2013        | Scales, 2016          |
|--------------------------------------------------------------------------------------------------------------------------------------------------------------------------------------------------|------------------|-------------------|-------------------|------------------|-------------------|------------------|------------------|-----------------------|
| 5.1) The trial analysed in accordance with a pre-specified plan and was finalized before unblinded outcome data were available for analysis                                                      | Probable yes     | Yes               | Yes               | Yes              | Yes               | Yes              | Probable yes     | Yes                   |
| 5.2) The numerical result being assessed was likely selected, on the basis of the results, from multiple outcome measurements (e.g., scales, definitions, time points) within the outcome domain | No               | No                | Probable No       | No               | No                | No               | No               | No                    |
| 5.3) The numerical result being assessed was likely selected, on the basis of the results, multiple analyses of the data                                                                         | Probable No      | No                | No                | Probable No      | No                | No               | Probable No      | Probable No           |
| 5.4) Risk-of-bias judgement                                                                                                                                                                      | Low Risk         | Low Risk          | Low Risk          | Low Risk of Bias | Low Risk          | Low Risk of Bias | Low Risk         | Some concerns         |
| Overall risk-of-bias judgement                                                                                                                                                                   | Low risk of bias | High risk of bias | High risk of bias | Low Risk of Bias | Low risk of bias  | Low Risk of Bias | Low risk of bias | Some concerns of bias |
